# Supplementary material for: Impact of fatigue as the primary determinant of functional limitations among patients with post-COVID-19 syndrome: a cross-sectional observational study
Source: PubMed Central journal article supplement (PMC10335413; doi:10.1136/bmjopen-2022-069217), 2023-06-05

## Appendix

### Appendix 1: Mean scores for the overall WSAS score and individual WSAS domains

| WSAS Domain                | N    | Mean (SD)  | Range and threshold values                                                              |
|----------------------------|------|------------|-----------------------------------------------------------------------------------------|
| WSAS overall score         | 2627 | 20.6 (9.9) | Range:0-40<br><10: subclinical<br>10 – 19: significant<br>>20: <b>Moderately severe</b> |
| Ability to work*           | 2621 | 4.6 (2.4)  | Subscale range: 0-8<br>0: not at all affected to<br>8: very severely affected           |
| Home management            | 2627 | 4.2 (2.2)  |                                                                                         |
| Social leisure activities  | 2627 | 4.0 (2.2)  |                                                                                         |
| Private leisure activities | 2627 | 4.7 (2.3)  |                                                                                         |
| Close relationships        | 2627 | 3.0 (2.4)  |                                                                                         |

\* Reduced number of completed answers as patients who had retired or chose not to work did not need to answer this question.

## Appendix 2: EQ-5D-5L frequencies and proportions reported by dimension and level

|                                                     | Mobility<br>n (%) | Self-care<br>n (%) | Usual activities<br>n (%) | Pain / discomfort<br>n (%) | Anxiety / depression<br>n (%) |
|-----------------------------------------------------|-------------------|--------------------|---------------------------|----------------------------|-------------------------------|
| <b>Level 1</b><br>(No problems)                     | 712(26.9)         | 318(12.0)          | 959(36.3)                 | 101(3.8)                   | 134(5.1)                      |
| <b>Level 2</b><br>(Slight problems)                 | 795(30.1)         | 1702(64.4)         | 250(9.5)                  | 983(37.2)                  | 701(26.5)                     |
| <b>Level 3</b><br>(Moderate problems)               | 309(11.7)         | 98(3.7)            | 506(19.1)                 | 358(13.5)                  | 675(25.5)                     |
| <b>Level 4</b><br>(Severe problems)                 | 810(30.6)         | 511(19.3)          | 759(28.7)                 | 373(14.1)                  | 267(10.1)                     |
| <b>Level 5</b><br>(Extreme problems / unable to do) | 17(0.6)           | 14(0.5)            | 169(6.4)                  | 828(31.3)                  | 866(32.8)                     |
| Total                                               | 2643(100)         | 2643(100)          | 2643(100)                 | 2643(100)                  | 2643(100)                     |

**Appendix 3:** Working days lost due to Post-COVID syndrome in 28 days prior to completion of Service Use Questionnaire

|                                              |              |
|----------------------------------------------|--------------|
| Number completed Service Use questionnaire   | 2600         |
| Number (%) who lost 1 or more days from work | 1321 (50.8)  |
| Mean number of working days lost (SD)*       | 13.8 (10.7)  |
| Median number of working days lost (IQR)*    | 10 (4 to 28) |

\* in those who lost 1 or more days off work

**Appendix 4:** EQ-5D index score multivariable model for different patient characteristics and PROM scores (N=2405)

| Patient Characteristics |              | Model coefficients (95% CI) | p-value | Change in R-squared *<br>[Full model R-sq=0.573) | Standardised effect size |
|-------------------------|--------------|-----------------------------|---------|--------------------------------------------------|--------------------------|
| Age                     | 18 to 29     | Reference                   |         |                                                  |                          |
|                         | 30 to 39     | -0.02 (-0.05, 0.01)         | 0.219   |                                                  |                          |
|                         | 40 to 49     | -0.03 (-0.06, -0.01)        | 0.009   |                                                  |                          |
|                         | 50 to 59     | -0.03 (-0.06, -0.01)        | 0.018   |                                                  |                          |
|                         | 60 to 69     | -0.06 (-0.09, -0.03)        | <0.0001 |                                                  |                          |
|                         | 70 and over  | -0.07 (-0.12, -0.02)        | 0.005   |                                                  |                          |
| Gender                  | Male         | Reference                   |         |                                                  |                          |
|                         | Female       | 0.00 (-0.01, 0.02)          | 0.786   |                                                  |                          |
| Educational             | No education | Reference                   |         |                                                  |                          |

|              |                                |                      |         |       |        |
|--------------|--------------------------------|----------------------|---------|-------|--------|
| level        | School leaver (NVQ 1-2)        | 0.00 (-0.04, 0.04)   | 0.948   |       |        |
|              | A-Level (NVQ-3)                | 0.02 (-0.02, 0.05)   | 0.389   |       |        |
|              | Degree (NVQ-4)                 | 0.01 (-0.02, 0.05)   | 0.464   |       |        |
|              | Postgraduate degree (NVQ-5)    | 0.02 (-0.01, 0.06)   | 0.210   |       |        |
| Ethnicity    | White                          | Reference            |         |       |        |
|              | Non-white                      | -0.02 (-0.04, 0.00)  | 0.073   |       |        |
| IMD Quintile | 1 (most deprived)              | Reference            |         |       |        |
|              | 2                              | 0.02 (0.00, 0.05)    | 0.059   |       |        |
|              | 3                              | 0.03 (0.00, 0.05)    | 0.025   |       |        |
|              | 4                              | 0.05 (0.02, 0.07)    | <0.0001 |       |        |
|              | 5 (least deprived)             | 0.03 (0.01, 0.06)    | 0.008   |       |        |
| PROMs        | FACIT-Fatigue (reversed scale) | -0.01 (-0.01, -0.01) | <0.0001 | 0.048 | -0.080 |
|              | PHQ-8                          | -0.01 (-0.01, -0.01) | <0.0001 | 0.010 | -0.044 |

|                             |                      |         |       |        |
|-----------------------------|----------------------|---------|-------|--------|
| GAD-7                       | -0.01 (-0.01, -0.01) | <0.0001 | 0.018 | -0.051 |
| MRC Dyspnoea Scale: Grade 1 | Reference            |         | 0.032 |        |
| MRC Dyspnoea Scale: Grade 2 | 0.02 (0.00, 0.04)    | 0.108   |       | 0.010  |
| MRC Dyspnoea Scale: Grade 3 | -0.02 (-0.04, 0.01)  | 0.191   |       | -0.009 |
| MRC Dyspnoea Scale: Grade 4 | -0.08 (-0.11, -0.05) | <0.0001 |       | -0.030 |
| MRC Dyspnoea Scale: Grade 5 | -0.25 (-0.30, -0.20) | <0.0001 |       | -0.045 |
| Dyspnoea-12                 | 0.00 (0.00, 0.00)    | <0.0001 | 0.003 | -0.020 |

\* Reduction in R-squared value when variable is removed from the final model. Overall model has R-squared value of 0.573

Appendix Figure 1: Frequency distribution of the first reported (baseline) WSAS

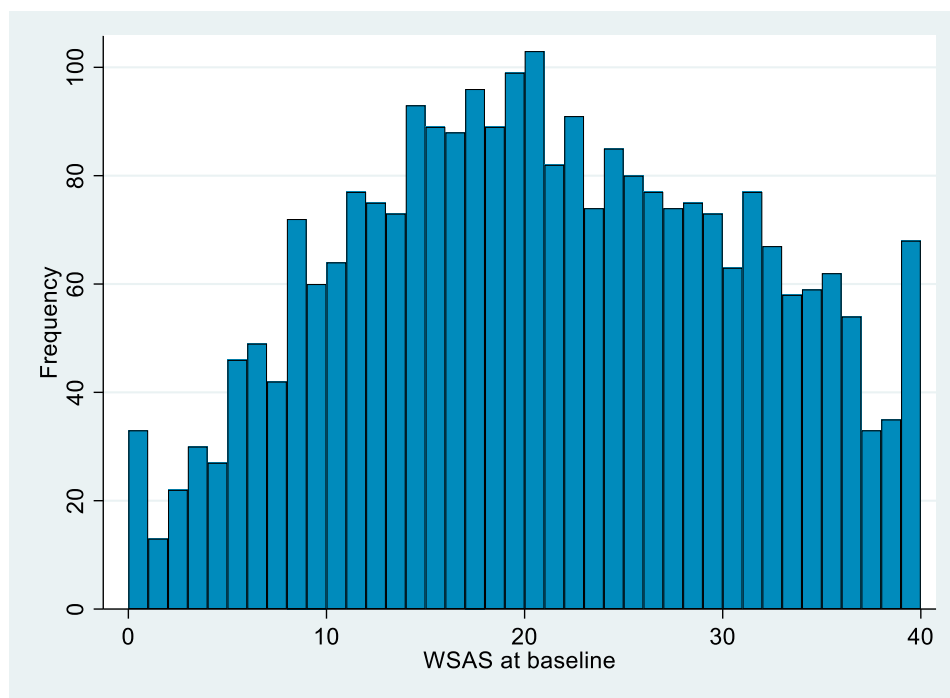

Appendix Figure 2: Frequency distribution of the first reported (baseline) EQ-5D Index Score

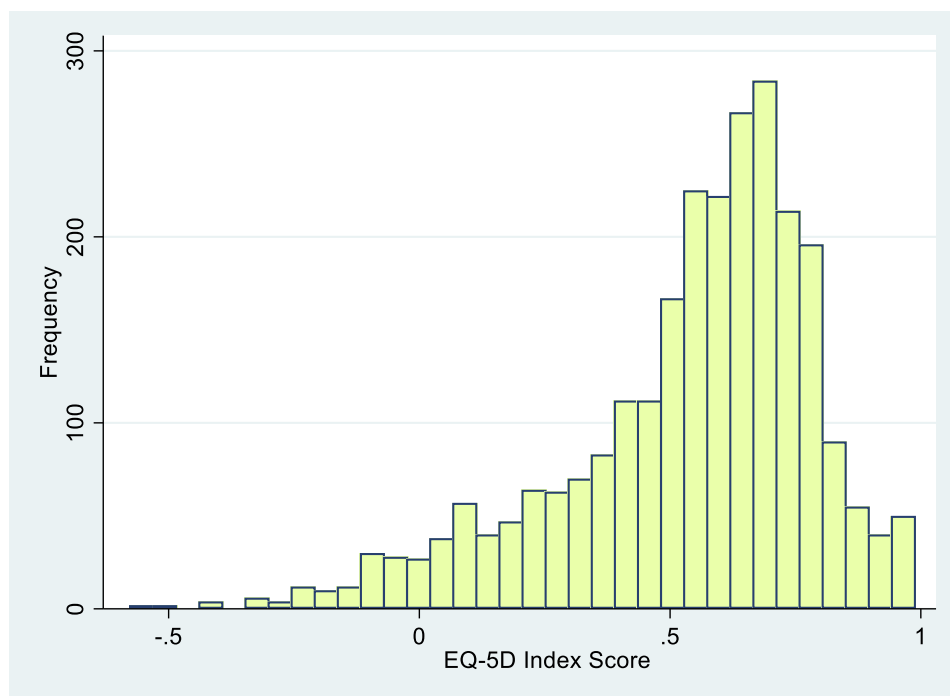

Supplement: bmjopen-2022-069217supp001.pdf [file bmjopen-2022-069217supp001.pdf]
